# Supplementary material
Source: MDPI journal article supplement (https://www.mdpi.com/2073-445X/12/1/243)
Supplement: s1 [file s1]

# Request for Questionnaire on "Study on Smart Zoos"

Dear visitors,

Hello!

This is Lin Yuxuan, a doctoral student from the Landscape Planning group at the Graduate School of Horticulture, Chiba University. Currently, we are doing a research on the smart zoo. In order to improve the visiting experience of the zoo, this study will collect the cognitive data of tourists on functions such as the official website or smart phone applications of the zoo through questionnaires. As we work to improve the situation of Ueno Zoo, we look forward to your comments and ideas.

Thanks

Chiba University  
Landscape Planning Group Ph.D student LIN YUXUAN.

648 Matsudo, Matsudo City Chiba University (Matsudo campus)  
Thank you for your cooperation!

\*必填

## Official website function

How often do you use the website function?

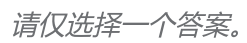

---



---

2. Official website function \*

How important do you think the website function is to the development of the smart zoo.

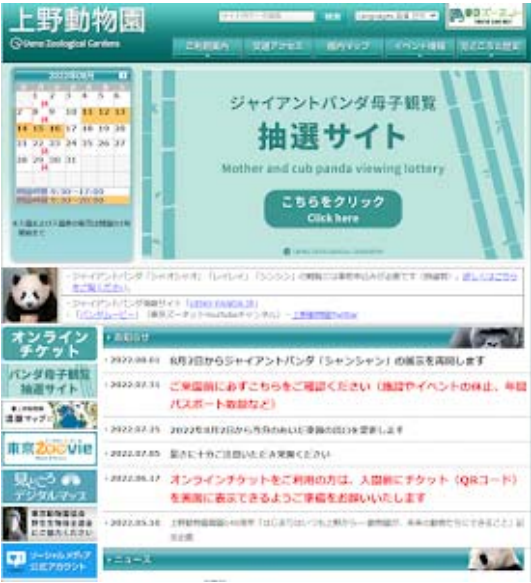

请仅选择一个答案。

No need

1 ☐

2 ☐

3 ☐

4 ☐

5 ☐

Very important

3. Online information access \*

How often do you use the Online information access?

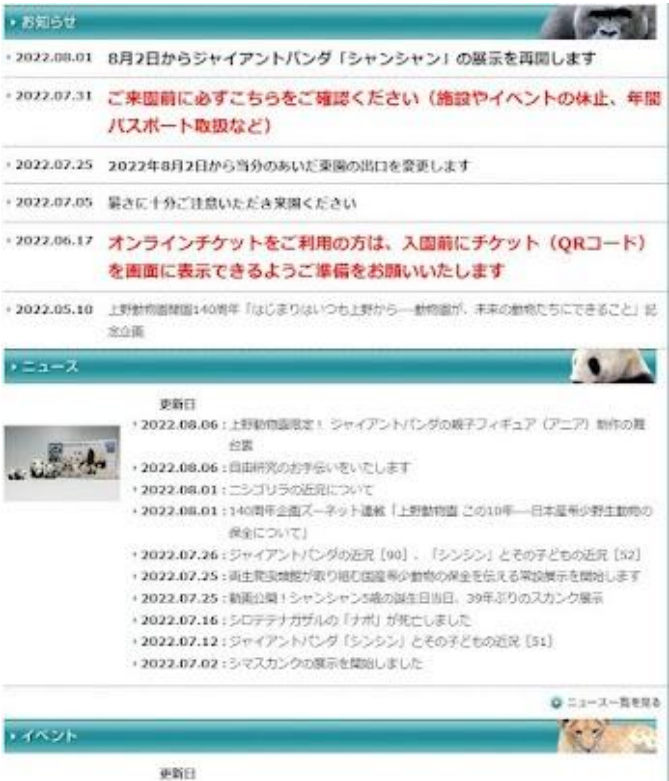

请仅选择一个答案。

Never use

1 ☐

2 ☐

3 ☐

4 ☐

5 ☐

Often use

4. Online information access \*

How important do you think the Online information access is to the development of the smart zoo.

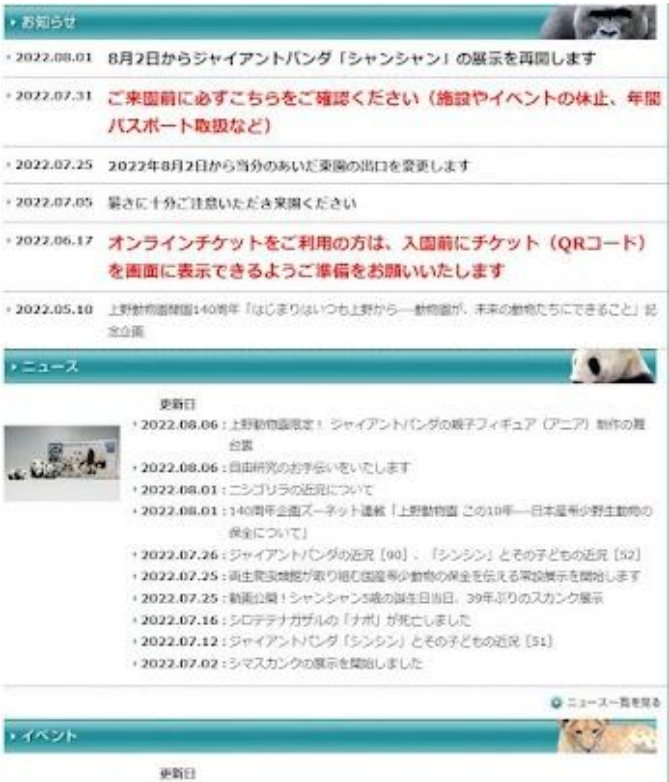

请仅选择一个答案。

No need

1

2

3

4

5

Very important

5. Event notice \*

How often do you use the Event notice?

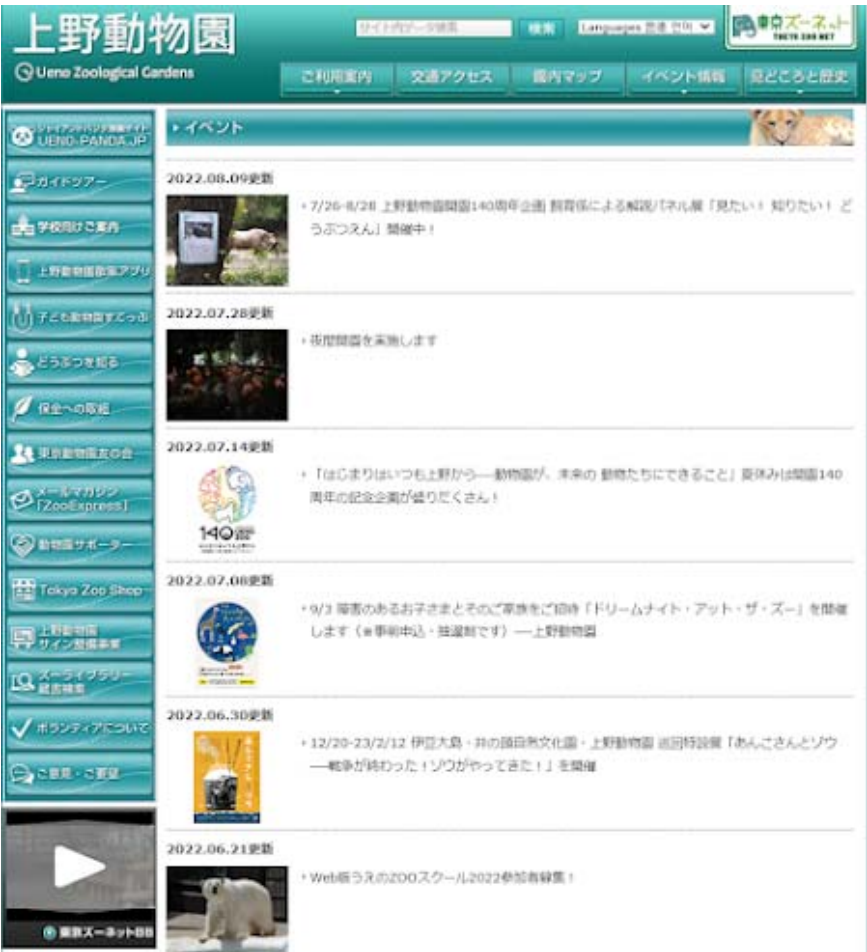

请仅选择一个答案。

Never use

1

☐

2

☐

3

☐

4

☐

5

☐

Often use

6. Event notice ★

How important do you think the Event notice is to the development of the smart zoo.

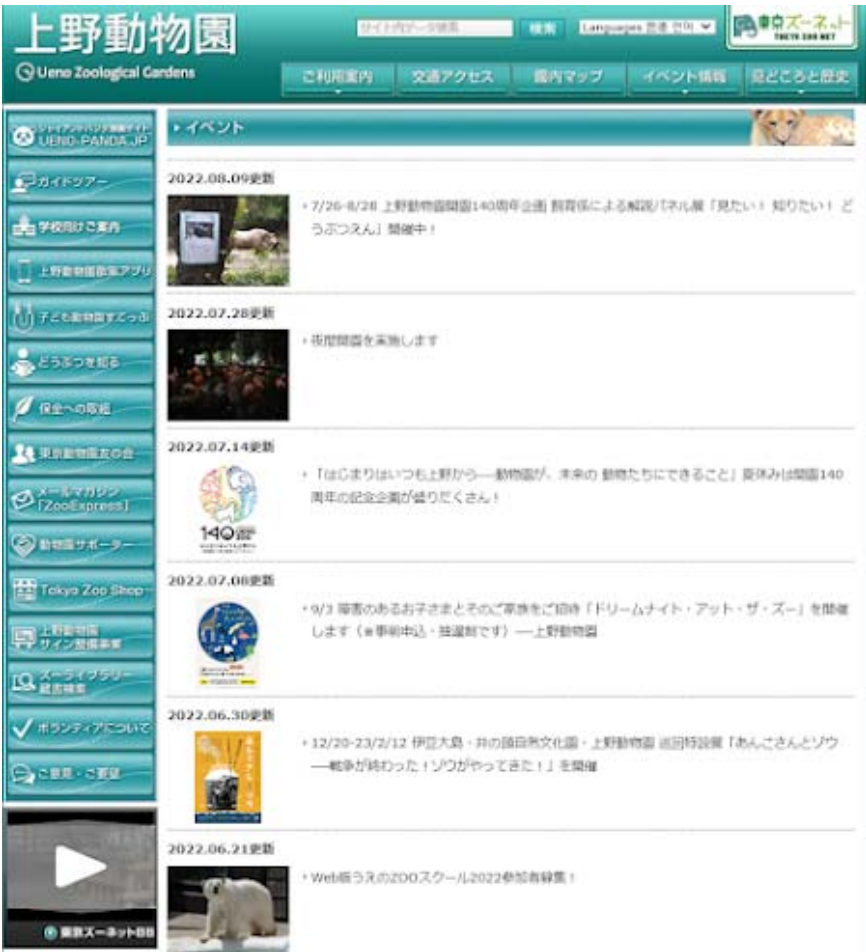

请仅选择一个答案。

No need

1

2

3

4

5

Very important

7. Message notification (Mail from Tokyo Zoonet) \*

How often do you use the Message notification?

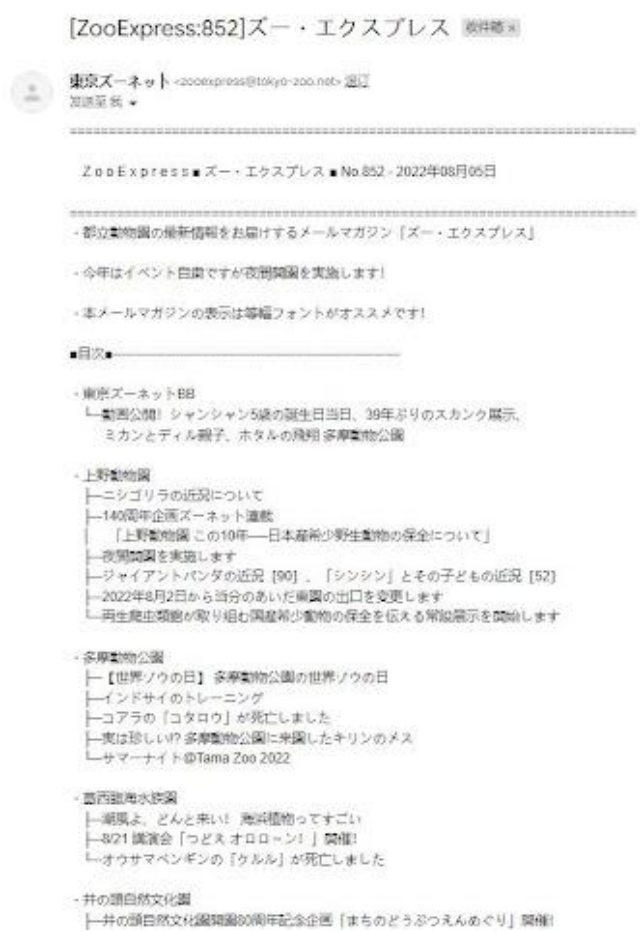

请仅选择一个答案。

Never use

1 ☐

2 ☐

3 ☐

4 ☐

5 ☐

Often use



8. Message notification (Mail from Tokyo Zoonet) \*

How important do you think the Message notification is to the development of the smart zoo.

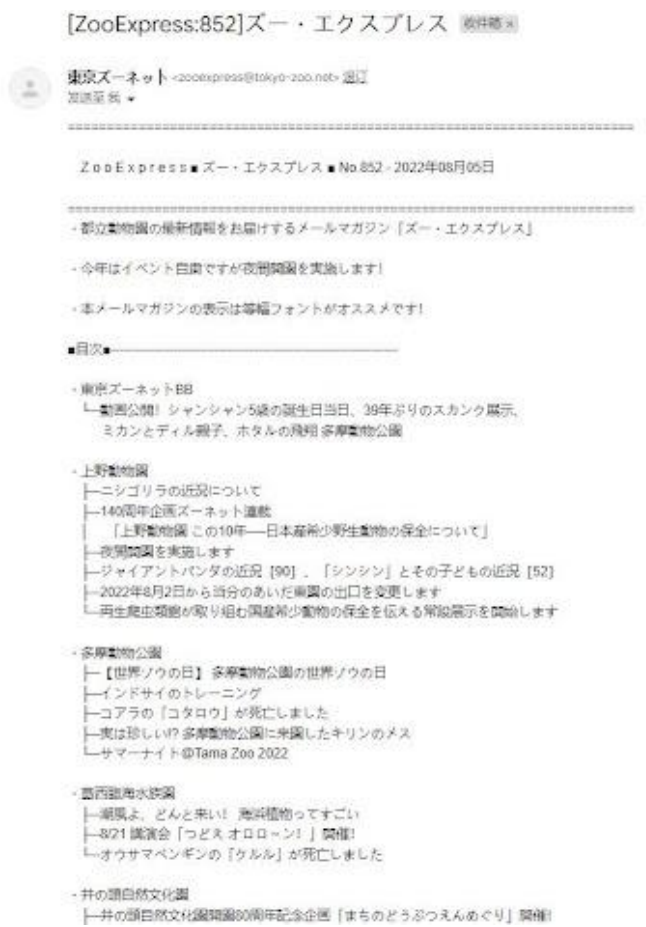

请仅选择一个答案。

No need

1

2

3

4

5

Very important

9. Electronic claim system \*

How often do you use the Electronic claim system?

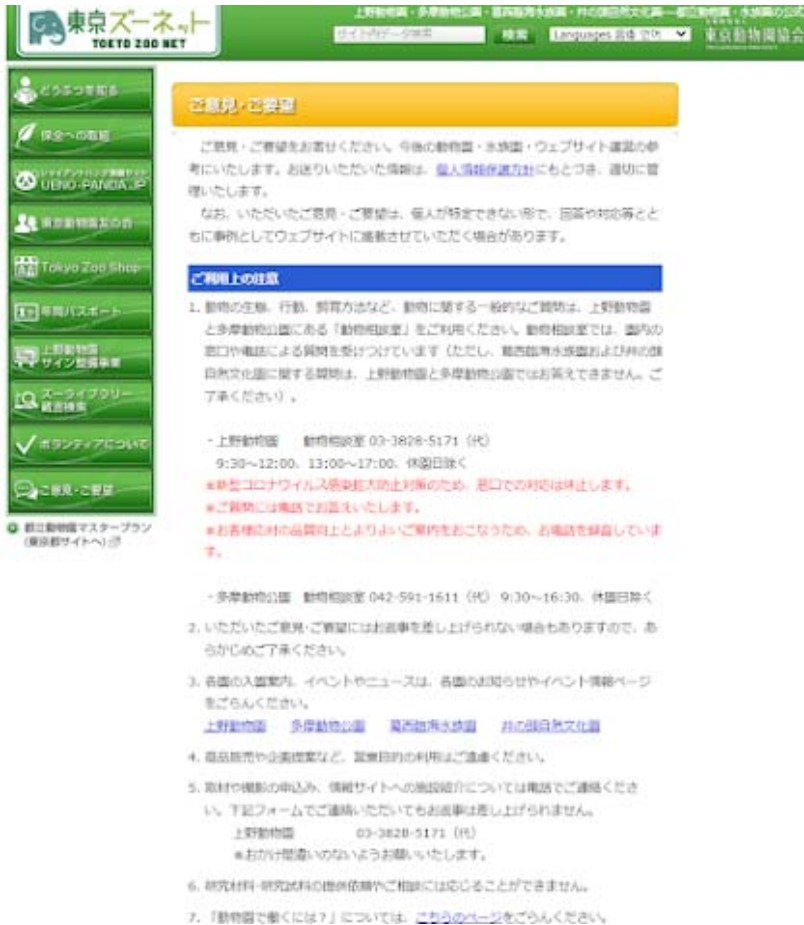

请仅选择一个答案。

Never use

1

2

3

4

5

Often use

10. Electronic claim system \*

How important do you think the Electronic claim system is to the development of the smart zoo.

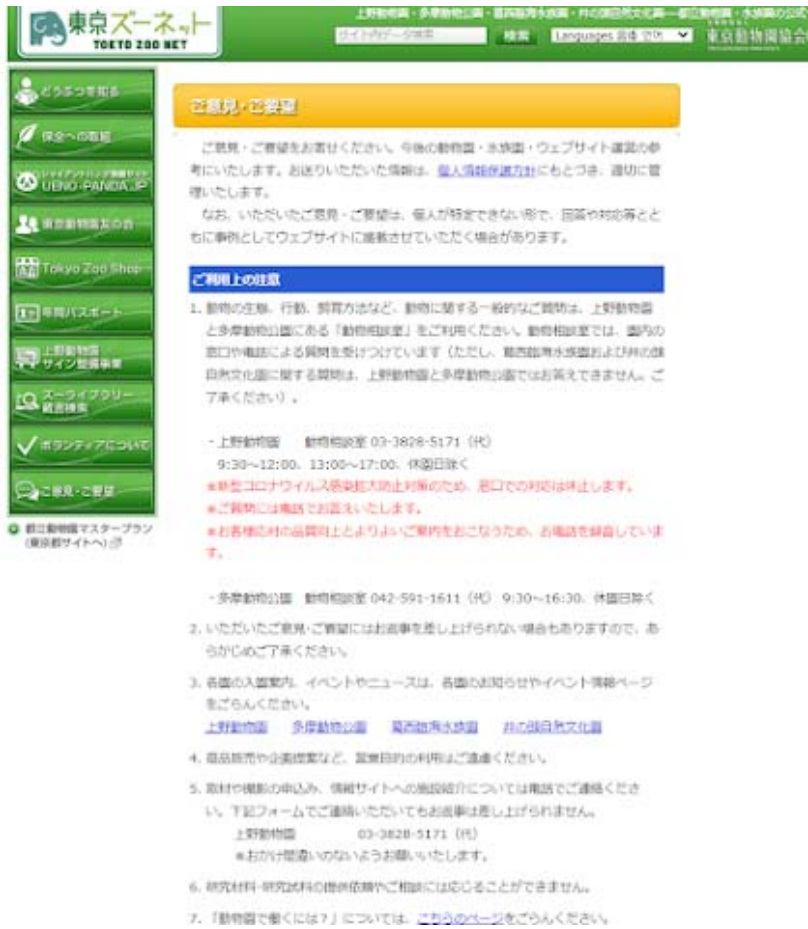

请仅选择一个答案。

No need

1

☐

2

☐

3

☐

4

☐

5

☐

Very important

How often do you use the Electronic ticket system?

请仅选择一个答案。



Often use



12. Electronic ticket system \*

How important do you think the Electronic ticket system is to the development of the smart zoo.

東京都恩賜上野動物園  
UENO ZOOLOGICAL GARDENS

### 【9:30-19:00 入園時間/Admission time】恩賜上野動物園 入場料オンライン決済

2022/08/11 9:30

(注)

※1) 以下の方はお申込み不要です

- ・現地で入場券または年鑑/パスポートを購入ご希望の方
- ・入場券、年間パスポート、東京ミュージアムぐるっとパスなどをお持ちの方
- ・東京動物園協会・東京パークフレンド会員などの割引適用ご希望の方
- ・入場無料:小学生以下
- ・入場無料:東京都内在住在学の中学生(入園当日、生徒手帳をご持参ください)
- ・入場無料:身体障害者手帳等をお持ちの方ご本人と付添の方(原則1名)

※2) お支払いはクレジットカード決済 (Vise, Mastercard, JCB) のみです

※3) ご半額当日午前9時30分まではキャンセルが可能です (キャンセル方法については、このサイトのトップページまたはお申込み後の確認メールをご覧ください)

\*1) You don't have to purchase online tickets for the following case  
- Visitor who is willing to purchase ticket onsite  
- Visitor who has an admission ticket or annual passport  
- Free admission: children(0-12)  
- Free admission: junior high school students living in Tokyo or attending schools in Tokyo  
- Free admission: disabled person and one attendant  
\*2) Credit card payment only (Vise, Mastercard, JCB)  
\*3) Cancellation is available until 9:30am on the day of visit (please check the top page or the confirmation email after purchase for further information).

チケット枚数  
1申込につき5枚までお申込できます

0

(1)入場料オンライン決済 一般  
Adult(16-64): ¥600  
※備考「※2」をご確認ください

0

(2)入場料オンライン決済 65歳以上  
Seniors(65+): ¥300  
※備考「※2」をご確認ください ※入園当日、年鑑確認ができるものをご持参ください

0

(3)入場料オンライン決済 中学生  
Students(13-15): ¥200  
※東京都内在住・在学の中学生は無料となります ※備考「※2」をご確認ください ※入園当日、生徒手帳をご持参ください

チケットを選択する

© K.K. etixdatafarm All Rights Reserved.

请仅选择一个答案。

No need

\_\_\_\_\_

1 ☐

\_\_\_\_\_

2 ☐

\_\_\_\_\_

3 ☐

\_\_\_\_\_

4 ☐

\_\_\_\_\_

5 ☐

\_\_\_\_\_

very important

13. Online booking \*  
How often do you use the Online booking?

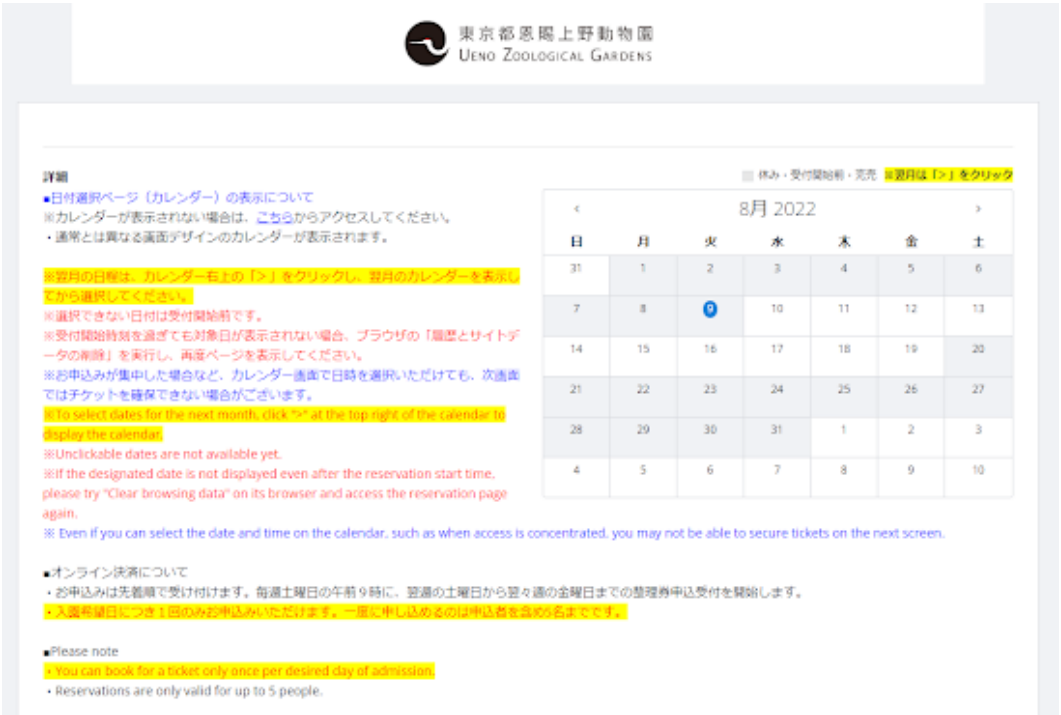

请仅选择一个答案。

Never use

1 ☐

2 ☐

3 ☐

4 ☐

5 ☐

Often use

14. Online booking \*

How important do you think the Online booking is to the development of the smart zoo.

東京都恩賜上野動物園  
UENO ZOOLOGICAL GARDENS

詳細

休み・受付開始前・発売

翌月は「>」をクリック

■日付選択ページ（カレンダー）の表示について

※カレンダーが表示されない場合は、こちらからアクセスしてください。

・通常とは異なる画面デザインのカレンダーが表示されます。

※翌月の日付は、カレンダー右上の「>」をクリックし、翌月のカレンダーを表示してから選択してください。

※選択できない日付は受付開始前です。

※受付開始時刻を過ぎても対象日が表示されない場合、ブラウザの「履歴とサイトデータの削除」を実行し、再度ページを表示してください。

※お申込みが集中した場合など、カレンダー画面で日時を選択いただいても、次画面ではチケットを確保できない場合がございます。

※To select dates for the next month, click ">" at the top right of the calendar to display the calendar.

※Unclickable dates are not available yet.

※If the designated date is not displayed even after the reservation start time, please try "Clear browsing data" on its browser and access the reservation page again.

※ Even if you can select the date and time on the calendar, such as when access is concentrated, you may not be able to secure tickets on the next screen.

■オンライン決済について

・お申込みは先着順で受け付けます。毎週土曜日の午前9時に、翌週の土曜日から翌々週の金曜日までの整理券申込受付を開始します。

・入園希望日につき1回のみお申込みいただけます。一度お申し込みの際は申込者を記載の皆さまです。

■Please note

・You can book for a ticket only once per desired day of admission

・Reservations are only valid for up to 5 people.

| 8月 2022 |    |    |    |    |    |    |
|---------|----|----|----|----|----|----|
| 日       | 月  | 火  | 水  | 木  | 金  | 土  |
| 31      | 1  | 2  | 3  | 4  | 5  | 6  |
| 7       | 8  | 9  | 10 | 11 | 12 | 13 |
| 14      | 15 | 16 | 17 | 18 | 19 | 20 |
| 21      | 22 | 23 | 24 | 25 | 26 | 27 |
| 28      | 29 | 30 | 31 | 1  | 2  | 3  |
| 4       | 5  | 6  | 7  | 8  | 9  | 10 |

请仅选择一个答案。

No need

1

☐

2

☐

3

☐

4

☐

5

☐

Very important



15. Tourism Blog \*

How often do you use the Tourism Blog?

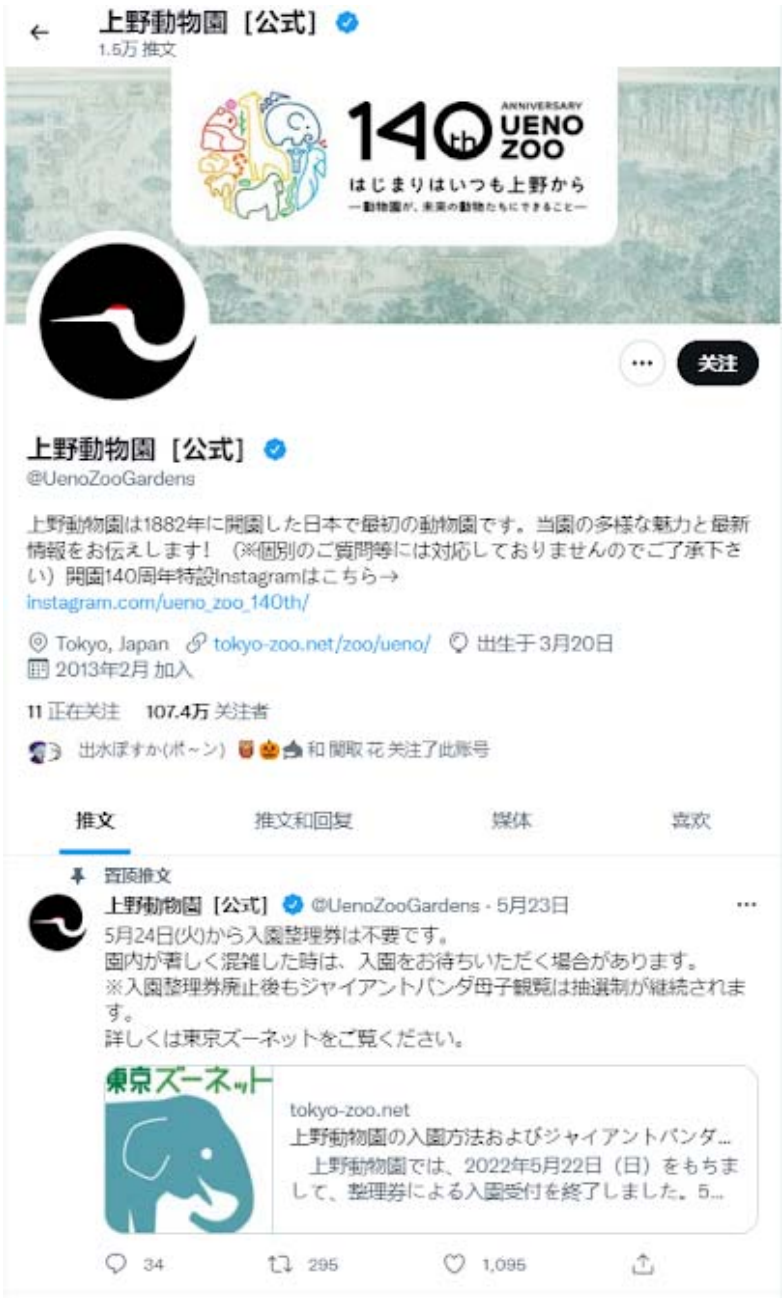

请仅选择一个答案。

Never use

1 ☐

2 ☐

3 ☐

4 ☐

5

Often use

16。 Tourism Blog \*

How important do you think the Tourism Blog is to the development of the smart zoo.

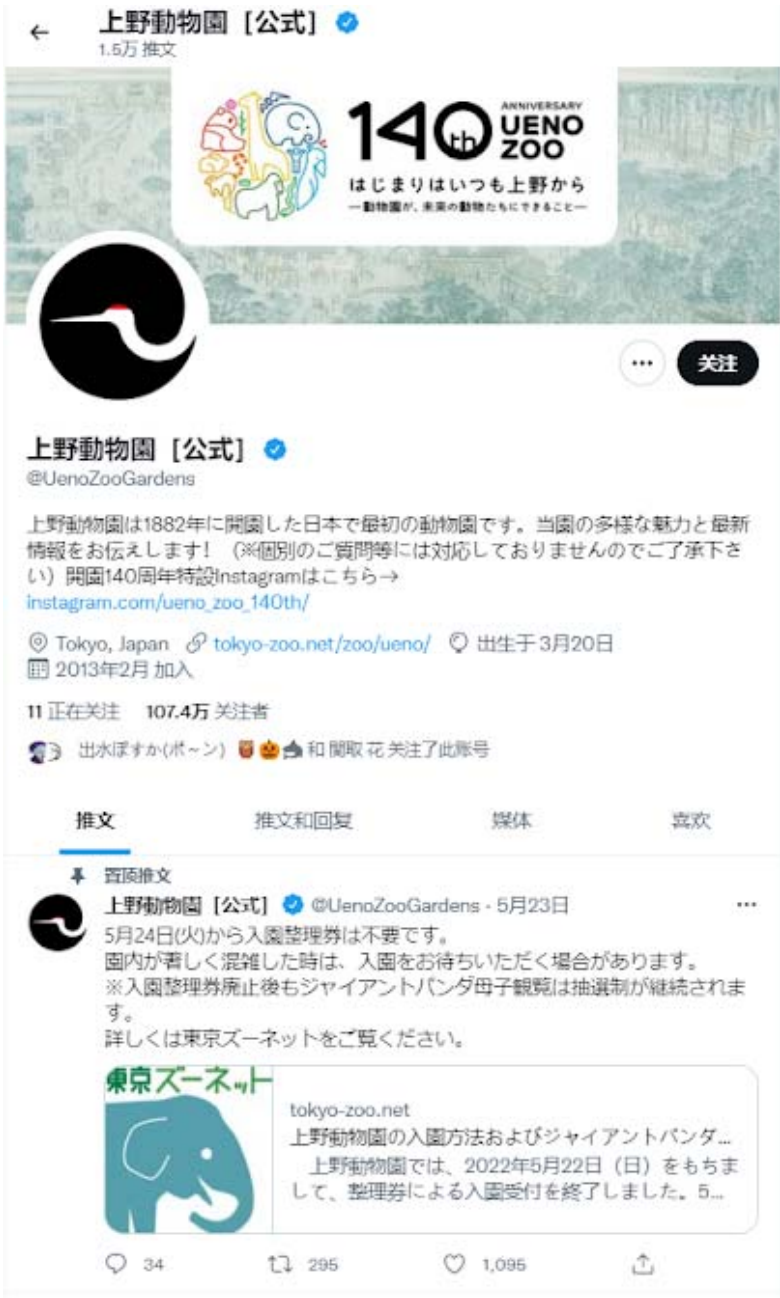

请仅选择一个答案。

No need

1

2

3

4

5

Very important

TokyoZoonet function

17。 Animal introduction platform \*  
How often do you use the Animal introduction platform?

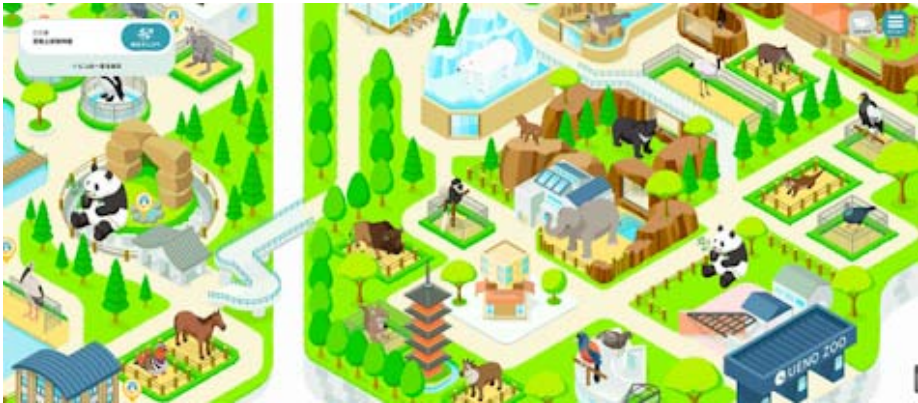

请仅选择一个答案。

Never use

1

2

3

4

5

Often use

18. Animal introduction platform \*

How important do you think the Animal introduction platform is to the development of the smart zoo.

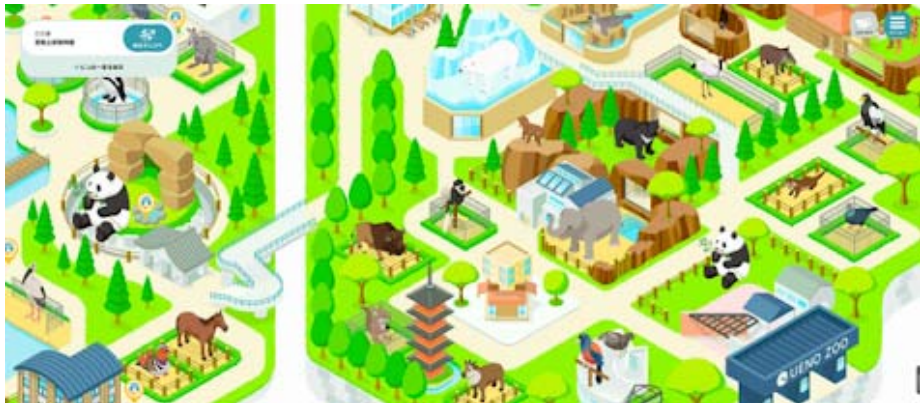

请仅选择一个答案。

No need

☐

1

☐

2

☐

3

☐

4

☐

5

☐

Very important

☐

19。 VR sightseeing ★

How often do you use the VR sightseeing?

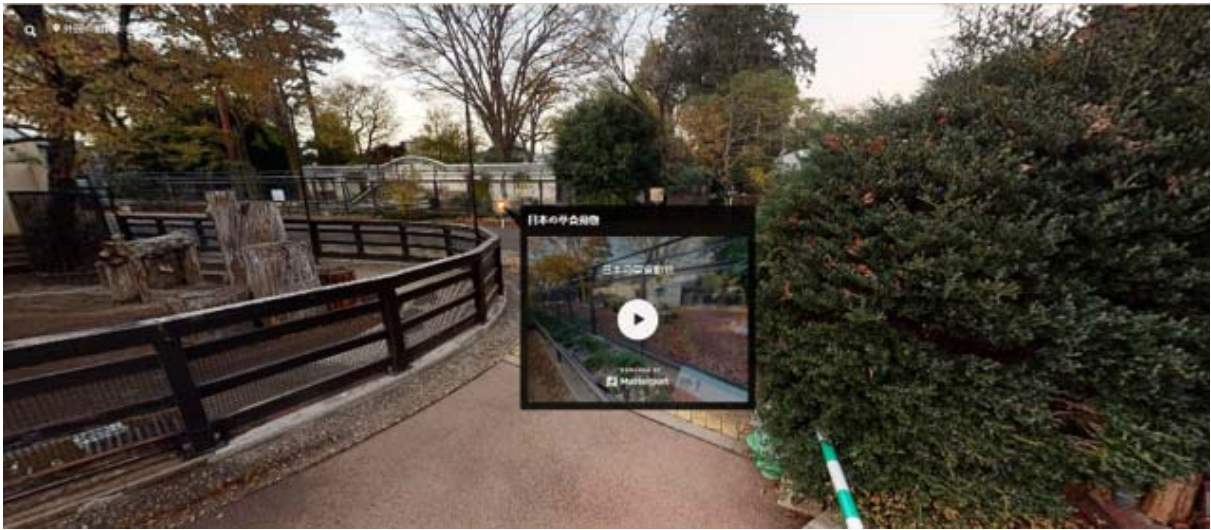

请仅选择一个答案。

Never use

☐

1 ☐

2 ☐

3 ☐

4 ☐

5 ☐

Often use



20。 VR sightseeing \*

How important do you think the VR sightseeing is to the development of the smart zoo.

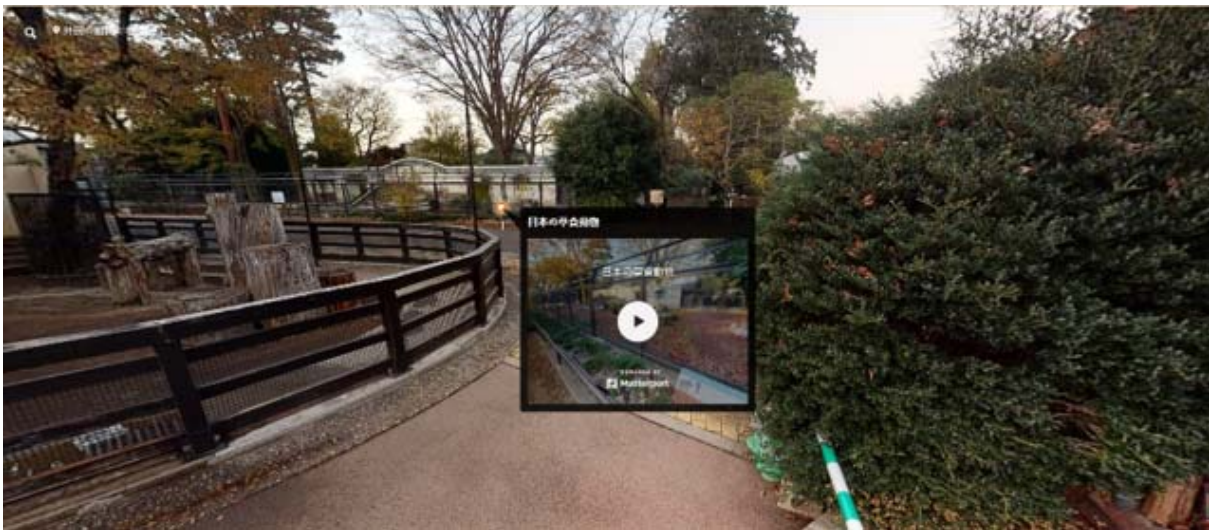

请仅选择一个答案。

No need

1 ☐

2 ☐

3 ☐

4 ☐

5 ☐

Very important

21。 3D model \*

How often do you use the 3D model?

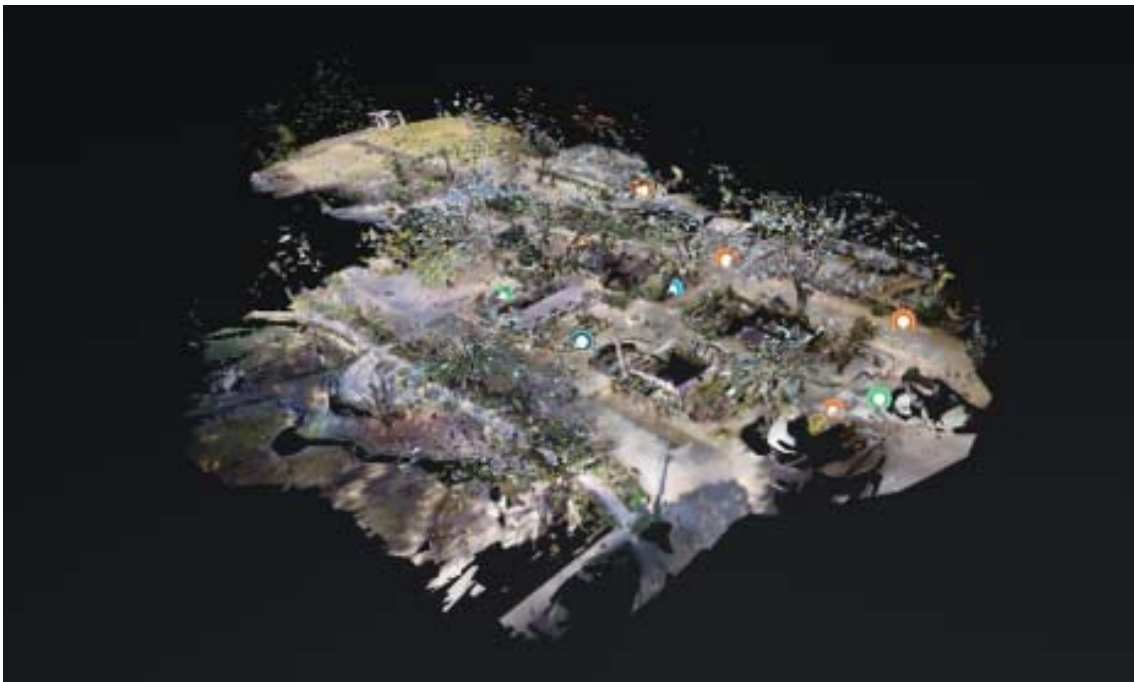

请仅选择一个答案。

Never use

☐

1 ☐

☐

2 ☐

☐

3 ☐

☐

4 ☐

☐

5 ☐

☐

Often use

☐



22。 3D model \*

How important do you think the 3D model is to the development of the smart zoo.

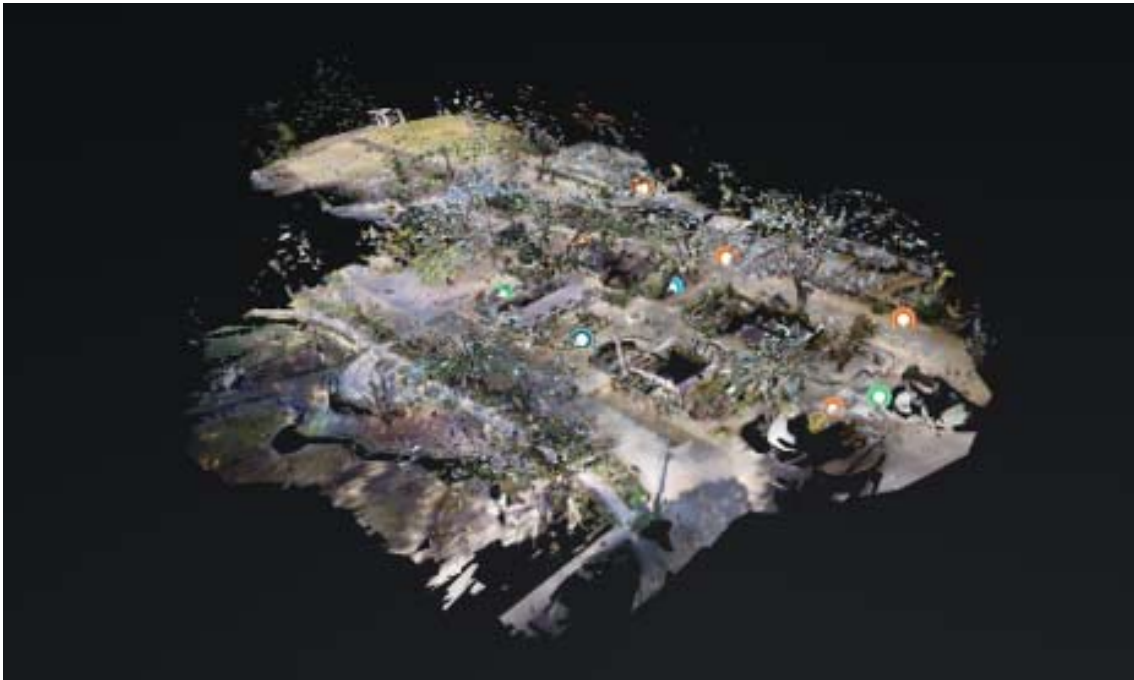

请仅选择一个答案。

No need

☐

1 ☐

☐

2 ☐

☐

3 ☐

☐

4 ☐

☐

5 ☐

☐

Very important

☐

Smart phone applications

23。 Application \*

How often do you use the Application?

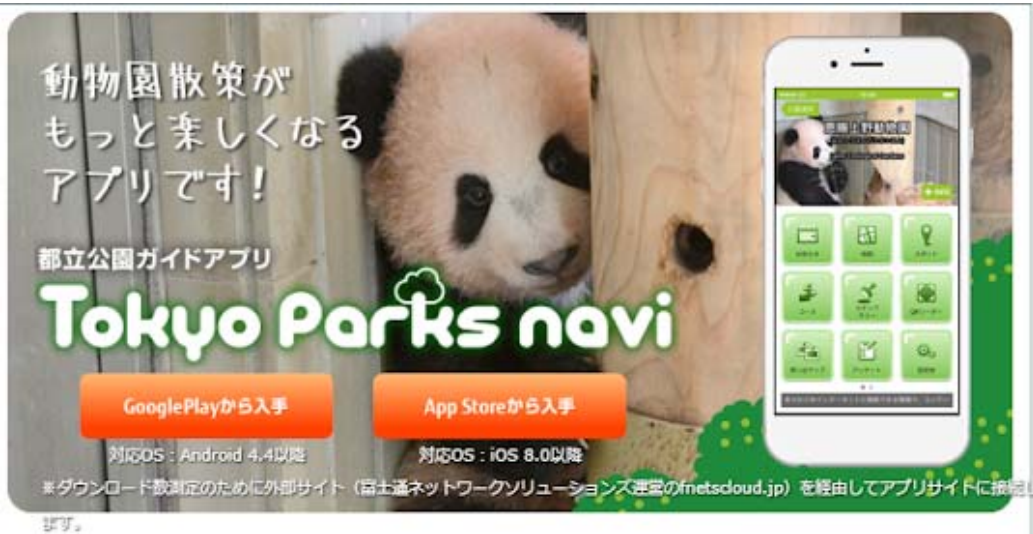

请仅选择一个答案。

Never use

☐

1 ☐

2 ☐

3 ☐

4 ☐

5 ☐

Often use

24。 Application \*

How important do you think the Application is to the development of the smart zoo.



请仅选择一个答案。

No need

☐

1 ☐

2 ☐

3 ☐

4 ☐

5 ☐

Very important

25. Digital map ★

How often do you use the Digital map?

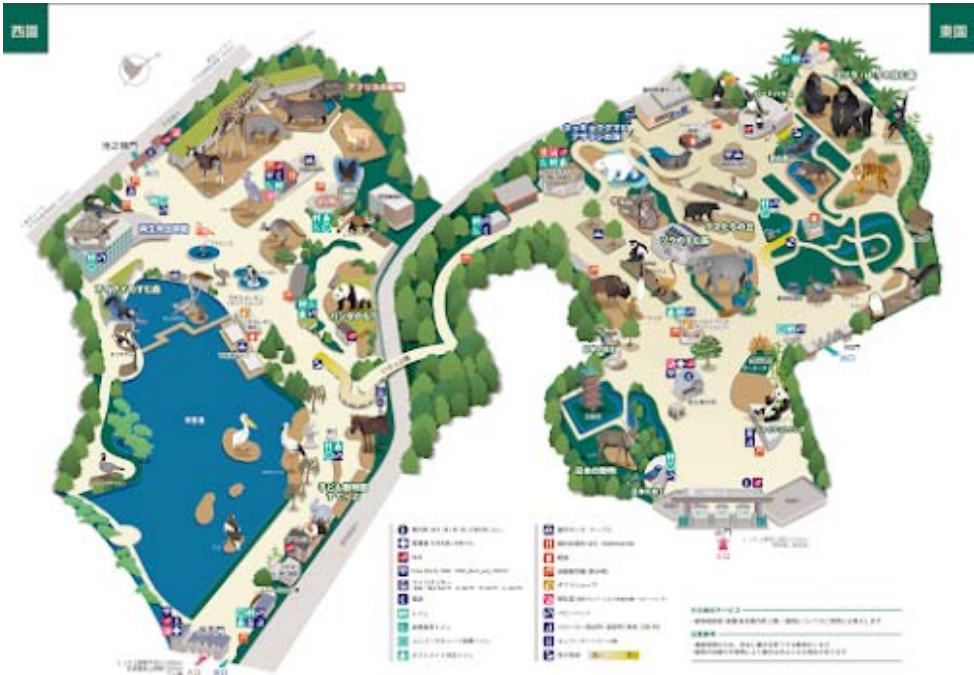

请仅选择一个答案。

Never use

1

2

3

4

5

Often use

26。 Digital map ★

How important do you think the Digital map is to the development of the smart zoo.



请仅选择一个答案。

No need

1

☐

2

☐

3

☐

4

☐

5

☐

Very important

27。 Sightseeing route recommendation \*

How often do you use the Sightseeing route recommendation?



代表的な動物をおすすめコースで  
効率よく見てまわろう

見る順を決めずにのんびり巡るのも楽しいですが、初めての散策でまわり方がわからなかったり、時間に限りがある方もいるかもしれません。そんな人向けに、代表的なスポットをまわれる「2時間でまわれる！上野動物園のエッセンス16」コースを提供しています。コース沿いのスポットが近づくと、自動的に音声ガイドが再生されます。

请仅选择一个答案。

Never use

1

2

3

4

5

Often use



28。 Sightseeing route recommendation \*

How important do you think the Sightseeing route recommendation is to the development of the smart zoo.

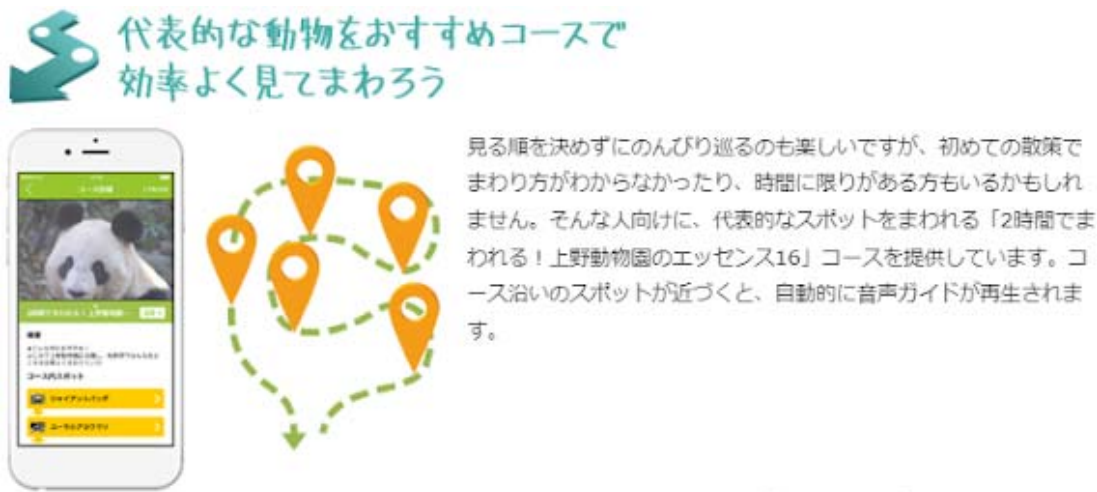

请仅选择一个答案。

No need

1

☐

2

☐

3

☐

4

☐

5

☐

Very important

29。 Stamp \*

How often do you use the Stamp?

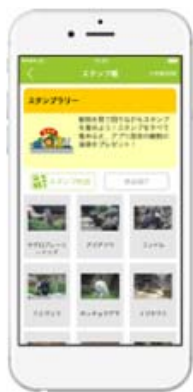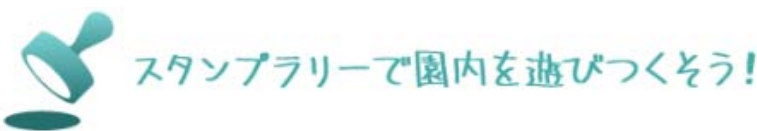

请仅选择一个答案。

Never use

\_\_\_\_\_

1 ☐

\_\_\_\_\_

2 ☐

\_\_\_\_\_

3 ☐

\_\_\_\_\_

4 ☐

\_\_\_\_\_

5 ☐

\_\_\_\_\_

Often use

\_\_\_\_\_



30。 Stamp \*

How important do you think the Stamp is to the development of the smart zoo.





スタンプラリーで園内を遊びつくそう！

動物を見てまわりながらスタンプを集めよう！ みごと10個すべてのスタンプを集めた方には上野動物園オリジナルの動物画像をプレゼントします。

请仅选择一个答案。

No need

1

☐

2

☐

3

☐

4

☐

5

☐

Very important

31。 Get information from QR code \*  
How often do you use the QR code?

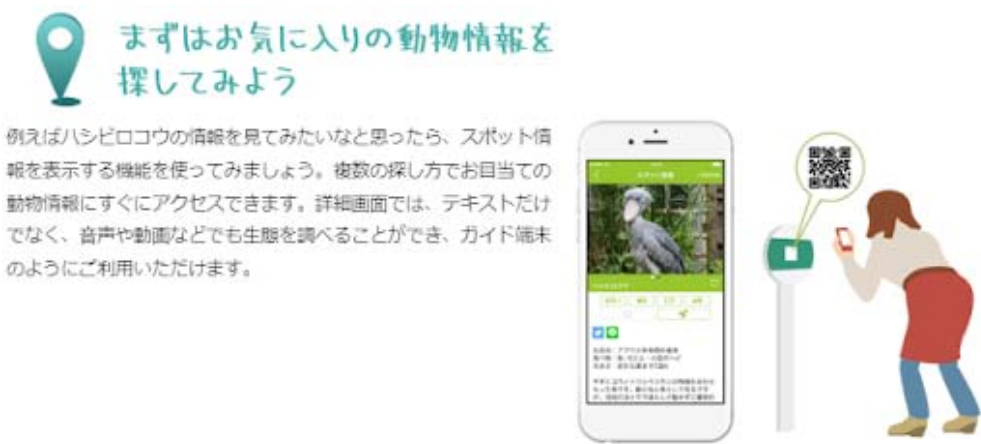

请仅选择一个答案。

Never use

\_\_\_\_\_

1 ☐

\_\_\_\_\_

2 ☐

\_\_\_\_\_

3 ☐

\_\_\_\_\_

4 ☐

\_\_\_\_\_

5 ☐

\_\_\_\_\_

Often use

\_\_\_\_\_

32。 Get information from QR code \*

How important do you think the QR code is to the development of the smart zoo.

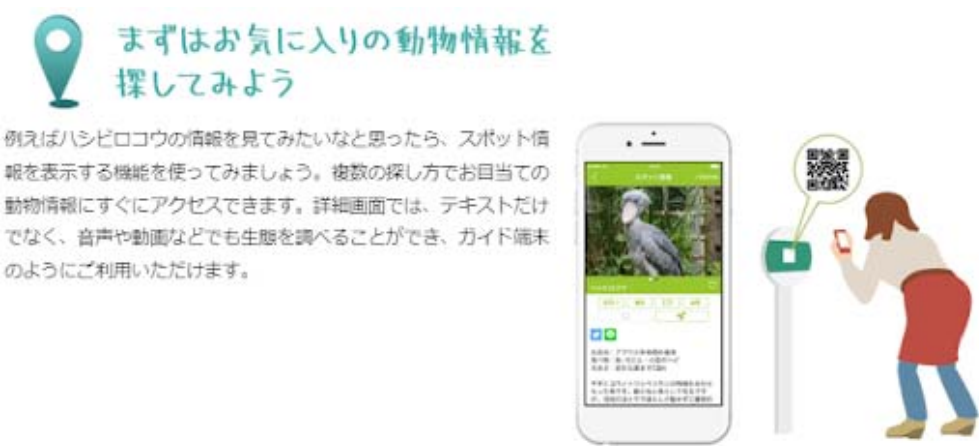

请仅选择一个答案。

No need

\_\_\_\_\_

1 ☐

\_\_\_\_\_

2 ☐

\_\_\_\_\_

3 ☐

\_\_\_\_\_

4 ☐

\_\_\_\_\_

5 ☐

\_\_\_\_\_

Very important

\_\_\_\_\_

33。 Animal information service \*

How often do you use the Animal information service?

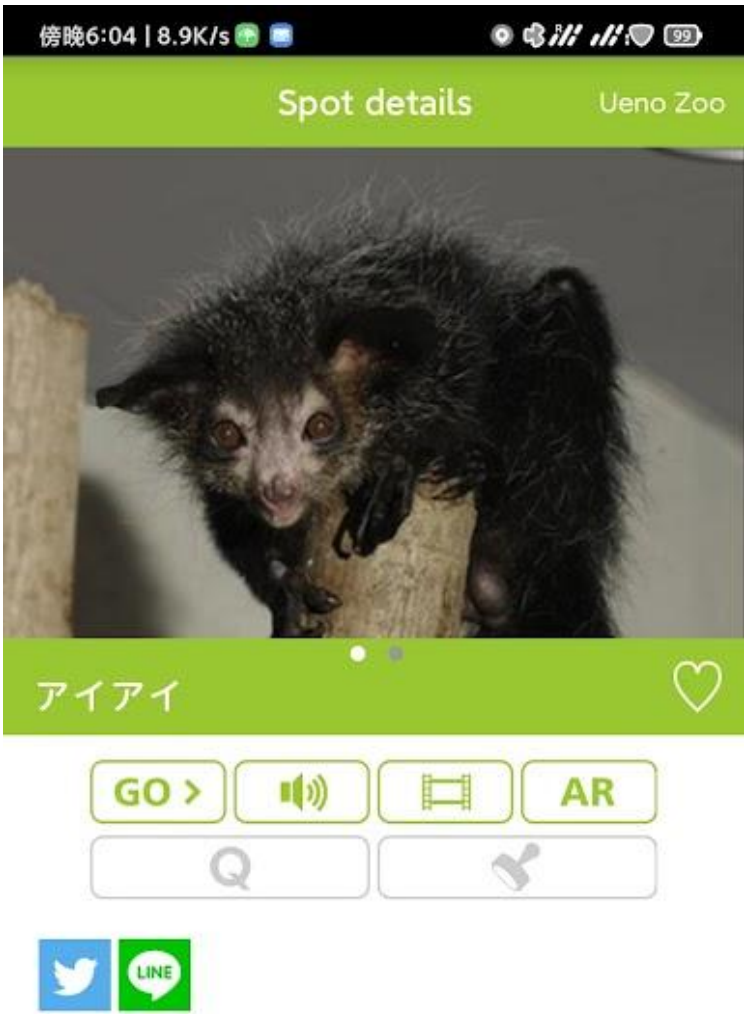

生息地：マダガスカル  
食べ物：ラミーの実の種の中身・虫の幼虫・果物・花蜜  
大きさ：体長約40cm  
尾長50～60cm

マダガスカルだけにすむ原始的なサルの仲間です。長い尾、大きな耳をもち、夜活動します。ラミーの実の種に穴をあけ、細長い中指で、種の中身をかきだして食べたり、木の中の虫の幼虫を探して食べたりします。現地では森林破壊により個体数が減っています。

请仅选择一个答案。

Never use

1 ☐

2

3

4

5

Often use

34。 Animal information service \*

How important do you think the Animal information service is to the development of the smart zoo.

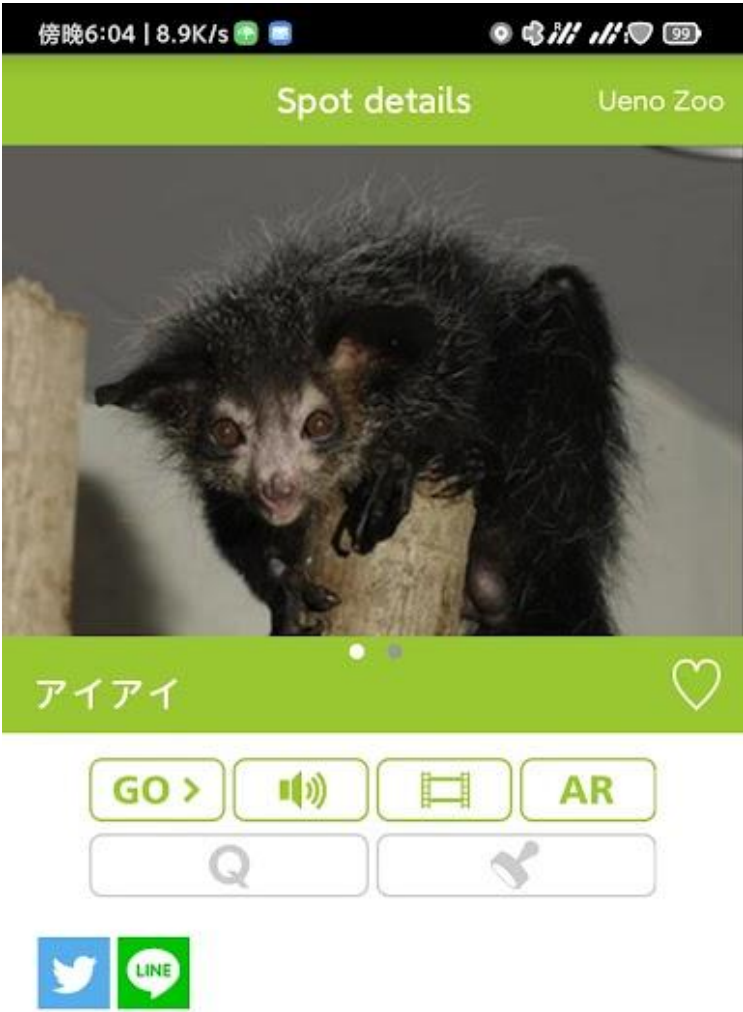

生息地：マダガスカル  
食べ物：ラミーの実の種の中身・虫の幼虫・果物・花蜜  
大きさ：体長約40cm  
尾長50～60cm

マダガスカルだけにすむ原始的なサルの仲間です。長い尾、大きな耳をもち、夜活動します。ラミーの実の種に穴をあけ、細長い中指で、種の中身をかきだして食べたり、木の中の虫の幼虫を探して食べたりします。現地では森林破壊により個体数が減っています。

请仅选择一个答案。

No need

1

☐

2

3

4

5

Very important

Smart phone website applications (Tokyo zoovie)

35. Smart guide system \*

How often do you use the Smart guide system?

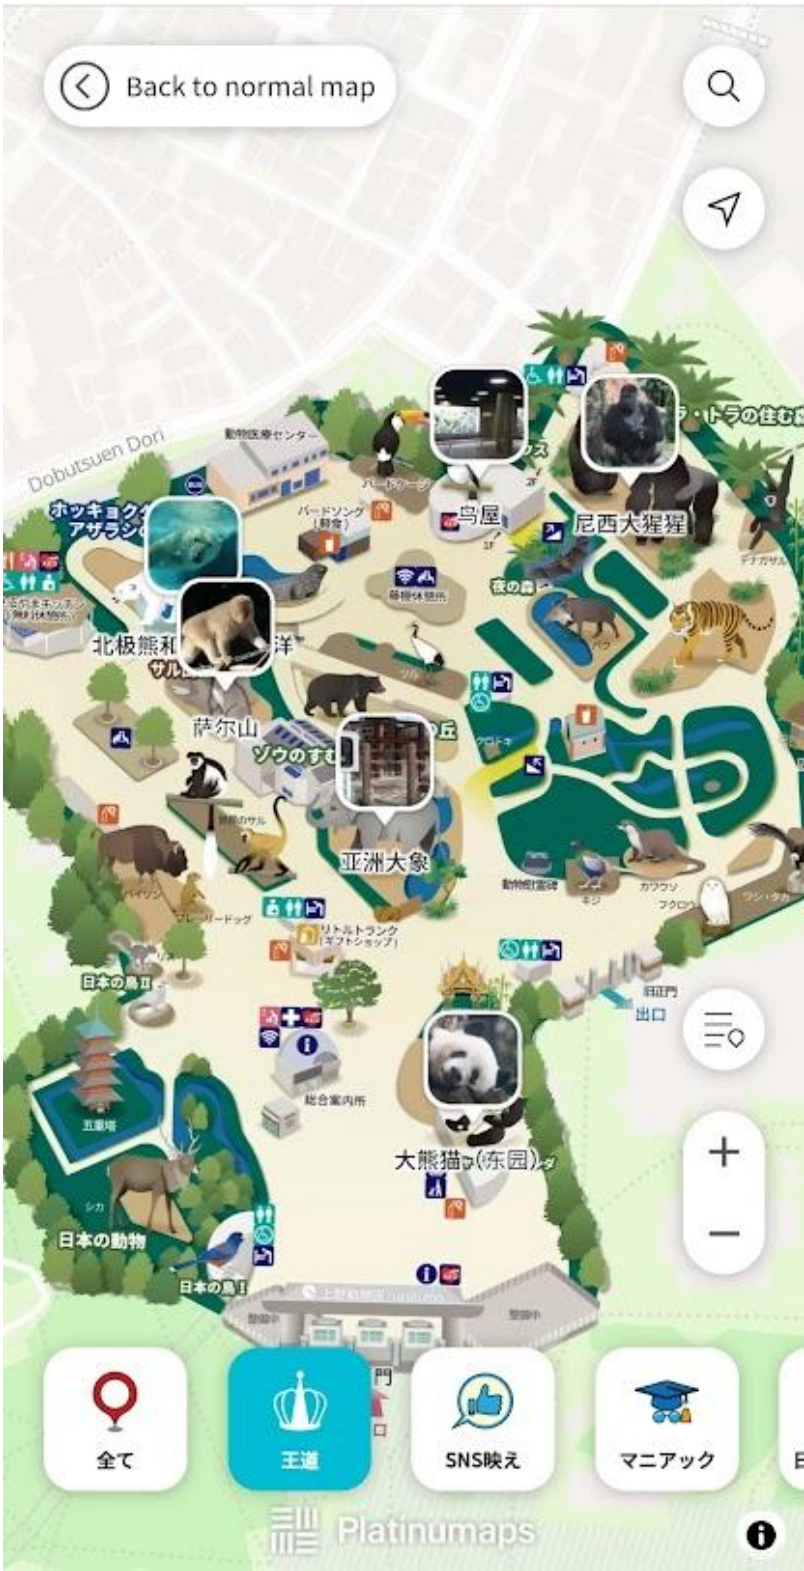

请仅选择一个答案。

Never use

1

2



Often use

36. Smart guide system <sup>\*</sup>

How important do you think the Smart guide system is to the development of the smart zoo.

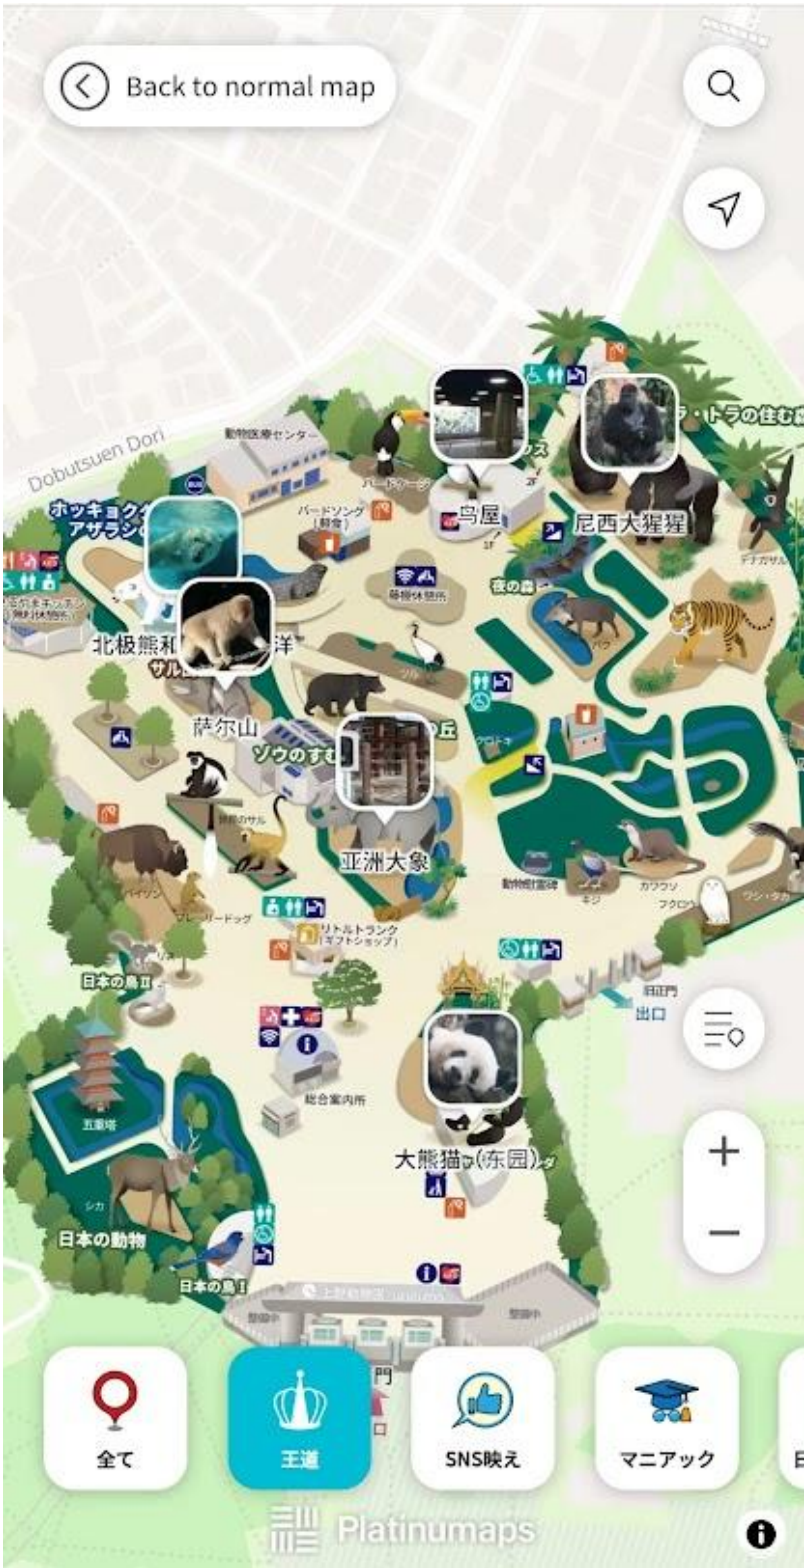

请仅选择一个答案。

No need

1

2

3

4

5

Very important

37. Tourist spots recommendation \*  
How often do you use the Tourist spots recommendation?

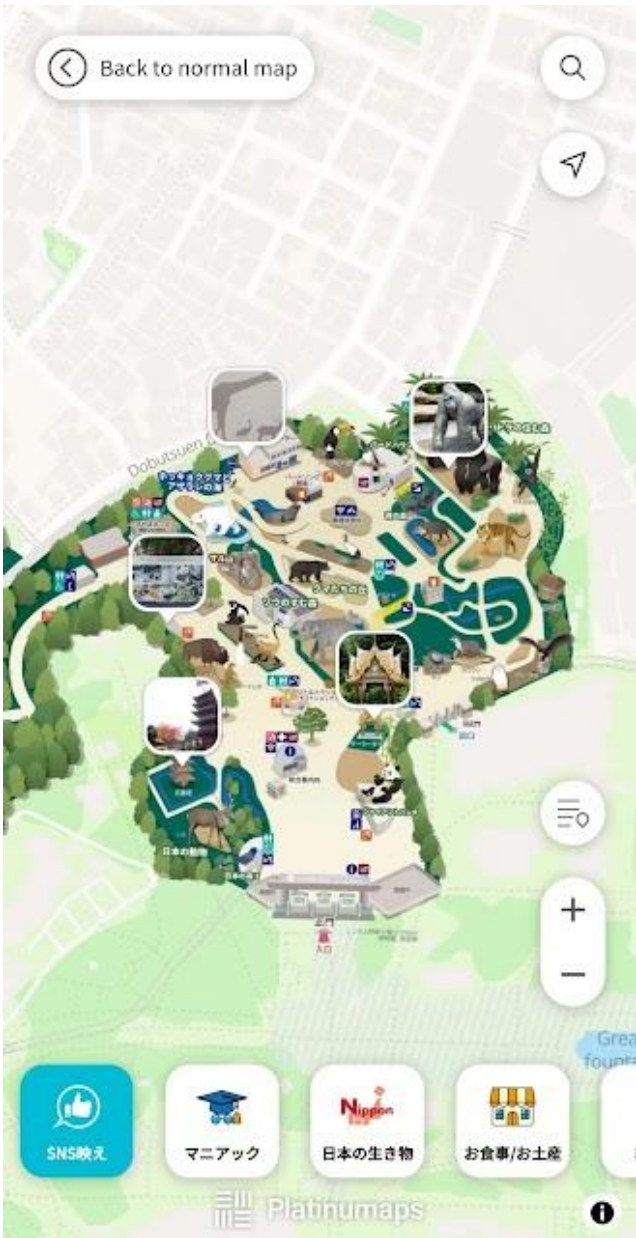

请仅选择一个答案。

Never use

1

2

3

4

5

Often use

38. Tourist spots recommendation \*

How important do you think the Tourist spots recommendation is to the development of the smart zoo.

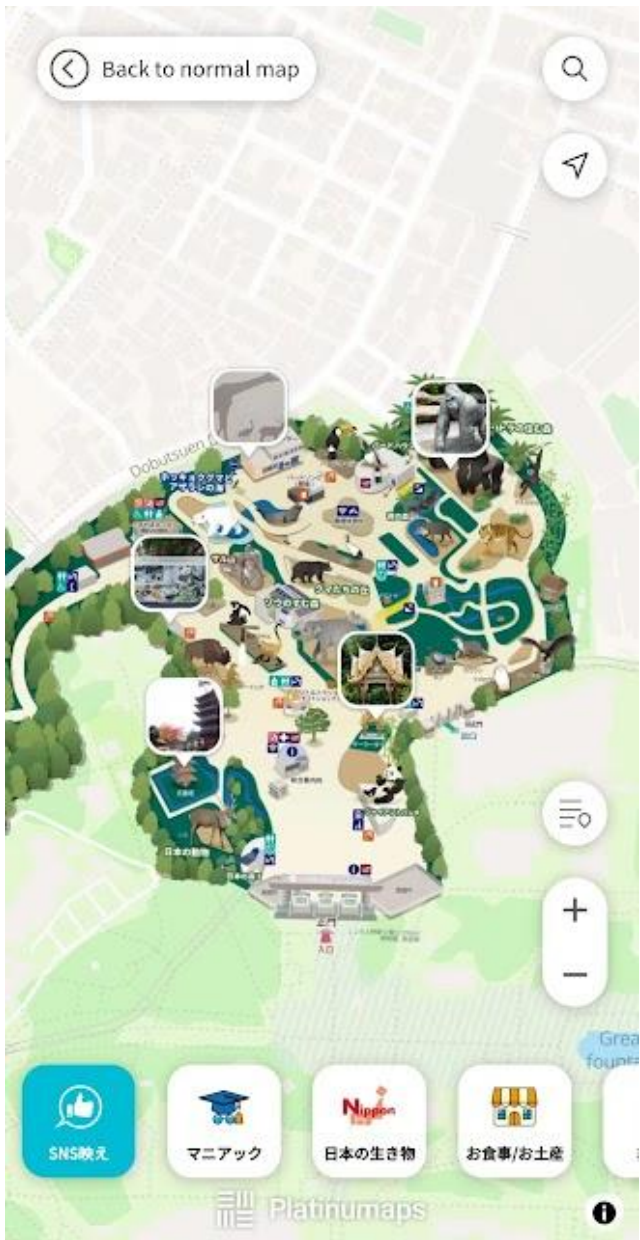

请仅选择一个答案。

No need

1

2

3

4

5

Very important

Functions within the zoo



39。 Free WIFI \*

How often do you use the Free WIFI?

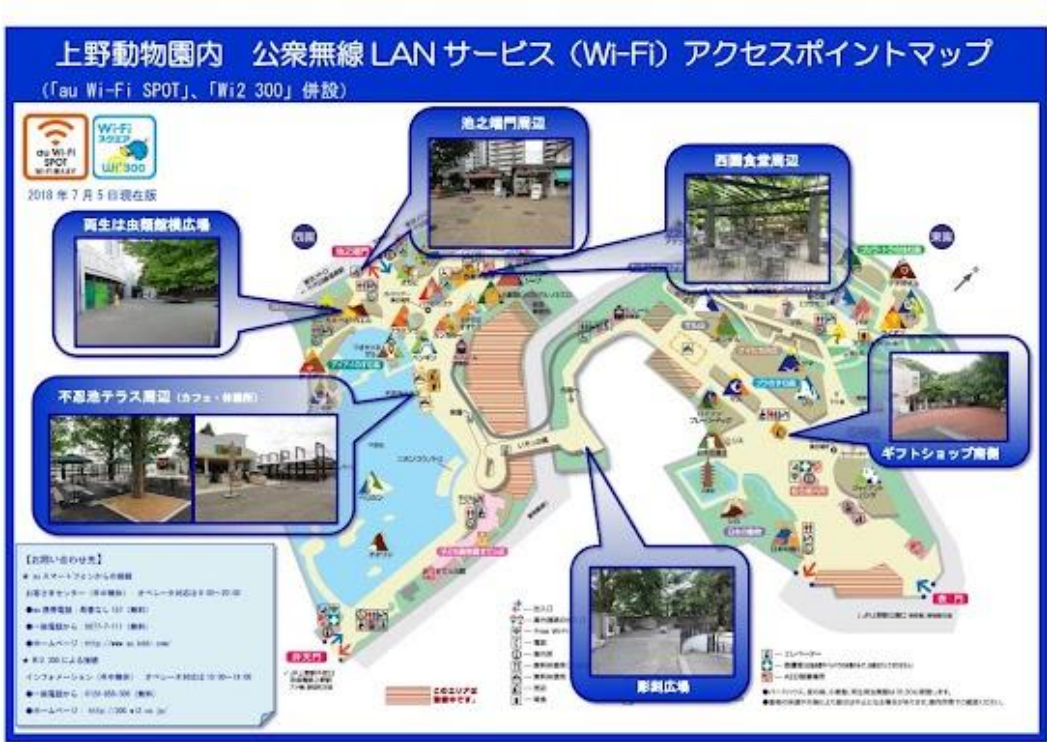

请仅选择一个答案。

Never use

1

2

3

4

5

Often use

40。 Free WIFI ★

How important do you think the Free WIFI is to the development of the smart zoo.



请仅选择一个答案。

No need

1

2

3

4

5

Very important

41。 Digital payment \*

How often do you use the Digital payment?

<クレジットカードおよび電子マネー決済について>  
各門の窓口および自動券売機では、以下の決済サービスがご利用いただけます。  
・クレジットカード（Visa、Mastercard、JCB、アメリカン・エクスプレス、ダイナースクラブ、ディスカバー）  
・電子マネー（Suicaおよび相互利用対象の交通系ICカード）

※園内では交通系ICカードのチャージはできません。

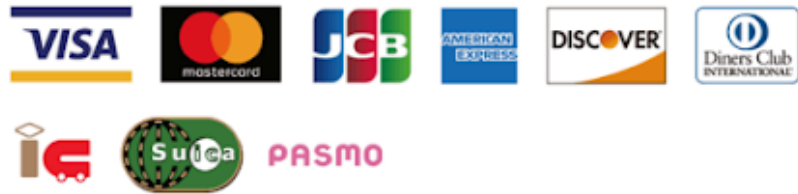

<QRコード決済について>  
各門の係員がいる窓口では、以下の決済サービスがご利用いただけます。  
・QRコード決済（PayPay、LINEPay、Alipay、WeChatPay）

※自動券売機では、上記の決済サービスはご利用いただけません。  
※QRコード決済導入は、東京都による「恩賜上野動物園におけるQRコード決済実証実験事業」として実施するものです。

请仅选择一个答案。

Never use

1

2

3

4

5

Often use

42。 Digital payment \*

How important do you think the Digital payment is to the development of the smart zoo.

<クレジットカードおよび電子マネー決済について>  
各門の窓口および自動券売機では、以下の決済サービスがご利用いただけます。  
・クレジットカード（Visa、Mastercard、JCB、アメリカン・エクスプレス、ダイナースクラブ、ディスカバー）  
・電子マネー（Suicaおよび相互利用対象の交通系ICカード）

※園内では交通系ICカードのチャージはできません。



<QRコード決済について>  
各門の係員がいる窓口では、以下の決済サービスがご利用いただけます。  
・QRコード決済（PayPay、LINEPay、Alipay、WeChatPay）

※自動券売機では、上記の決済サービスはご利用いただけません。  
※QRコード決済導入は、東京都による「恩賜上野動物園におけるQRコード決済実証実験事業」として実施するものです。

请仅选择一个答案。

No need

1

2

3

4

5

Very important

43。 Fund raising \*

How often do you use the Fund raising?

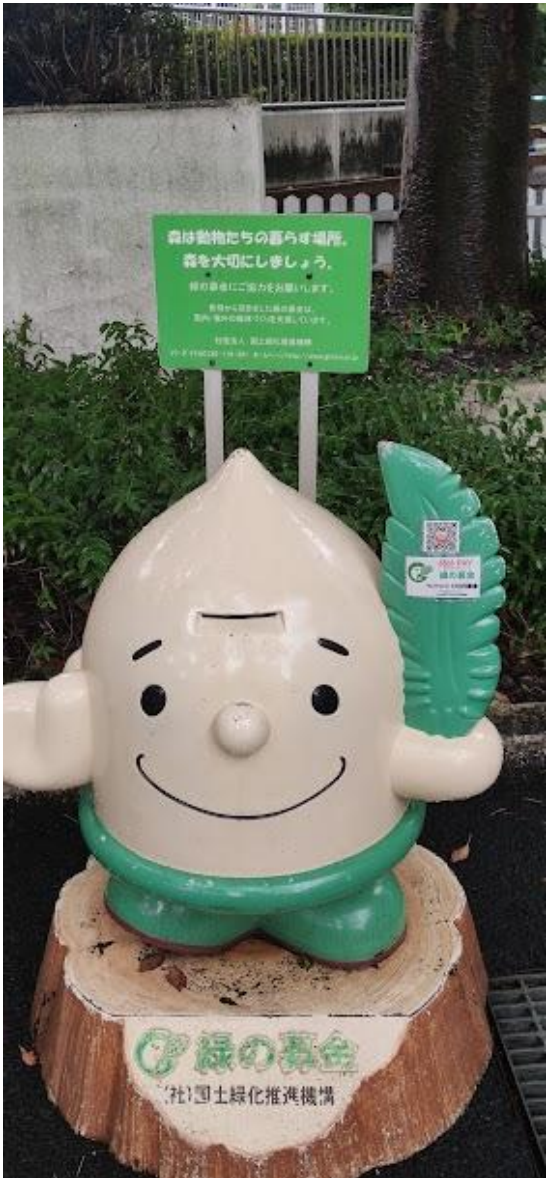

请仅选择一个答案。

Never use

1

☐

2

☐

3

☐

4

☐

5

☐

Often use

---



44。 Fund raising \*

How important do you think the Fund raising is to the development of the smart zoo.



请仅选择一个答案。

No need

1

☐

2

☐

3

☐

4

☐

5

☐

Very important



very important

45. Electronic information screen \*

How often do you use the Electronic information screen?

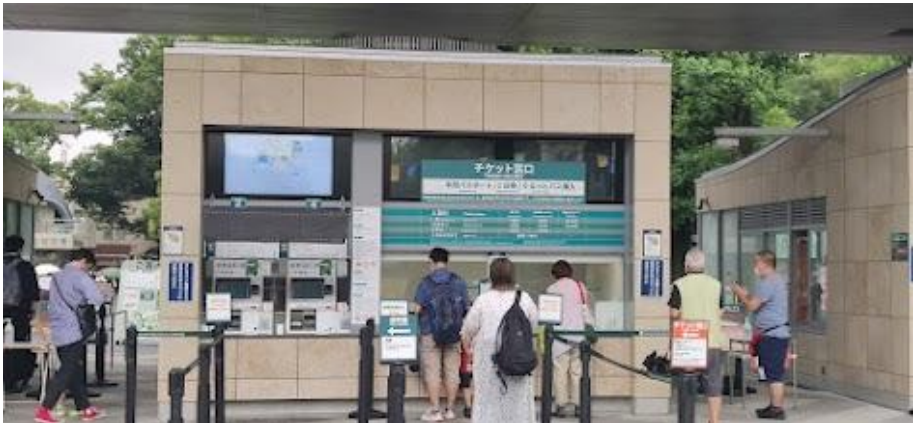

请仅选择一个答案。

Never use

1 ☐

2 ☐

3 ☐

4 ☐

5 ☐

Often use

46。 Electronic information screen \*

How important do you think the Electronic information screen is to the development of the smart zoo.



请仅选择一个答案。

No need

☐

1 ☐

2 ☐

3 ☐

4 ☐

5 ☐

Very important

47。 Animal state observation(Monitoring) \*

How often do you use the Animal state observation?

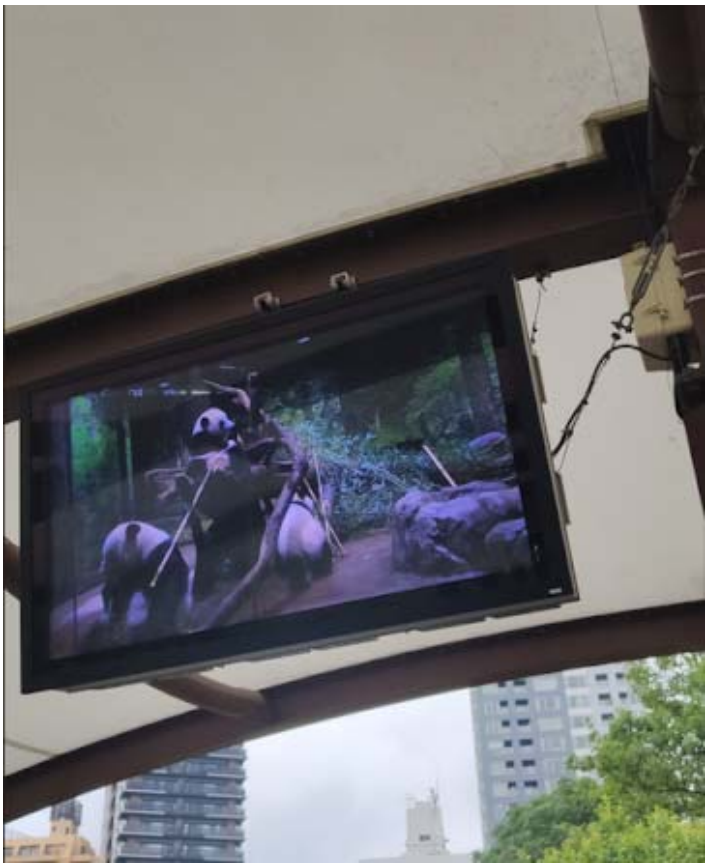

请仅选择一个答案。

Never use

☐

1 ☐

☐

2 ☐

☐

3 ☐

☐

4 ☐

☐

5 ☐

☐

Often use

☐

48。 Animal state observation(Monitoring) \*

How important do you think the Animal state observation is to the development of the smart zoo.

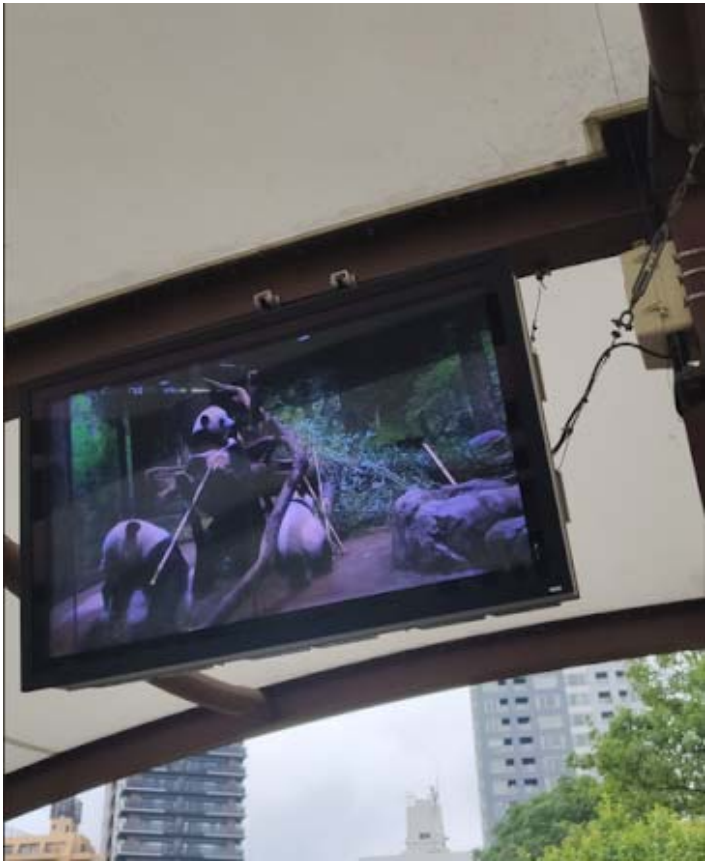

请仅选择一个答案。

No need

1 ☐

2 ☐

3 ☐

4 ☐

5 ☐

Very important

Opinions and requests

- 49。 Please let us know if you have any comments or ideas about smart zoos functions.

---

### Commonly used function

- 50。 What kind of function are you used to?

请仅选择一个答案。

- ☐ Official website function
- ☐ TokyoZoonet function
- ☐ Smart phone applications
- ☐ Smart phone website applications
- ☐ Functions within the zoo

### Personal information

- 51。 **Ages**

请仅选择一个答案。

- ☐ under 20 years old
- ☐ 21-30 years old
- ☐ 31-50 years old
- ☐ 51-60 years old
- ☐ over 60 years old

---

此内容不是由 Google 所创建，Google 不对其作任何担保。

Google 表单
